# Supplementary material for: A subtype of oral, laryngeal, esophageal, and lung, squamous cell carcinoma with high levels of TrkB-T1 neurotrophin receptor mRNA
Source: Springer Nature journal article supplement (doi:10.1186/s12885-019-5789-8), 2019-06-20

## A. OSCC

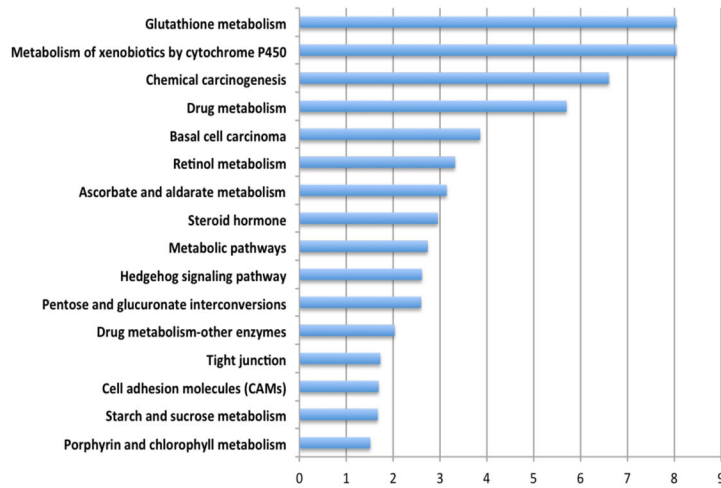

## B. ESSC

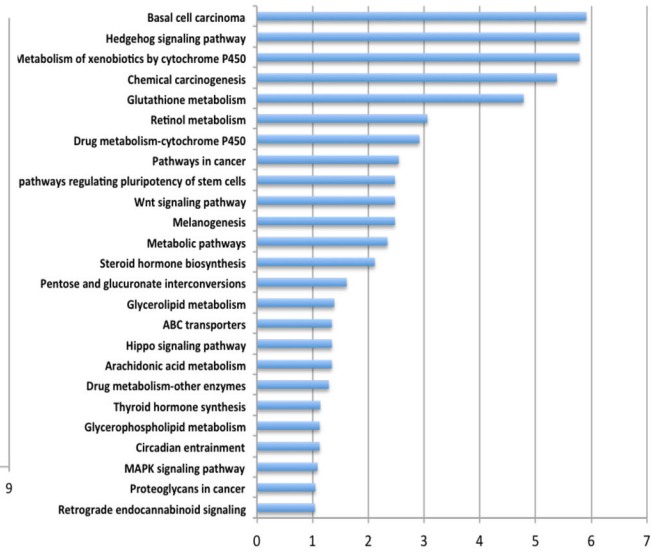

## C. LUSC

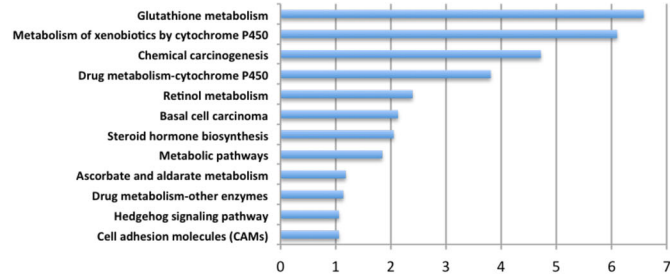

## D. LUAD

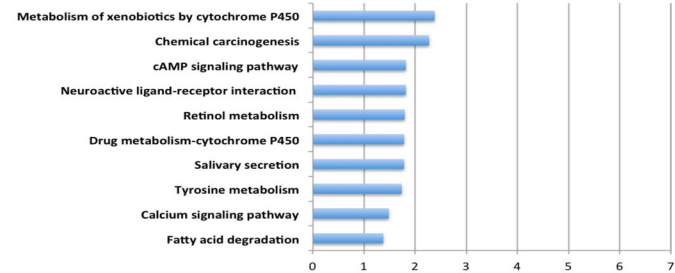

Supplement: MOESM4 [file 16838490]
